# Supplementary material for: Ioffe–Regel limit and lattice thermal conductivity reduction of high performance (AgSbTe2)15(GeTe)85 thermoelectric materials
Source: Royal Society of Chemistry journal article supplement (doi:10.1039/c3ta15147f), 2013-12-20
Supplement: c3ta15147f.pdf [file c3ta15147f.pdf]

Supporting information:

## Ioffe-Regel limit and lattice thermal conductivity reduction of high performance $(\text{AgSbTe}_2)_{15}(\text{GeTe})_{85}$ thermoelectric materials

Tiejun Zhu\*,<sup>a,b,c</sup>, Hongli Gao<sup>a</sup>, Yi Chen<sup>a</sup> and Xinbing Zhao<sup>a,b</sup>

<sup>a</sup>State Key Laboratory of Silicon Materials, Department of Materials Science and Engineering, Zhejiang University, Hangzhou 310027, China

<sup>b</sup>Key Laboratory of Advanced Materials and Applications for Batteries of Zhejiang Province, Zhejiang University, Hangzhou 310027, China

<sup>c</sup>Cyrus Tang Center for Sensor Materials and Applications, Zhejiang University, Hangzhou 310027, China

To whom correspondence should be addressed: [zhutj@zju.edu.cn](mailto:zhutj@zju.edu.cn)

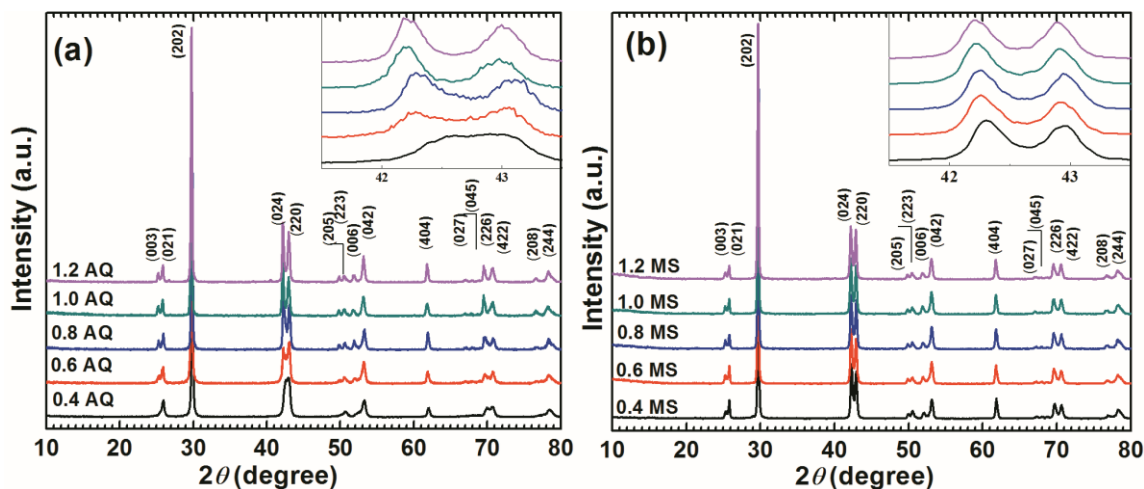

**Fig. S1** Comparison of XRD patterns for (a) slowly cooled samples and (b) melt spun samples. All the samples have formed solid solution with the space group R3m (JCPDS No. 47-1079). The insert shows the shift of (024) and (220) peak positions with increasing Ag content.

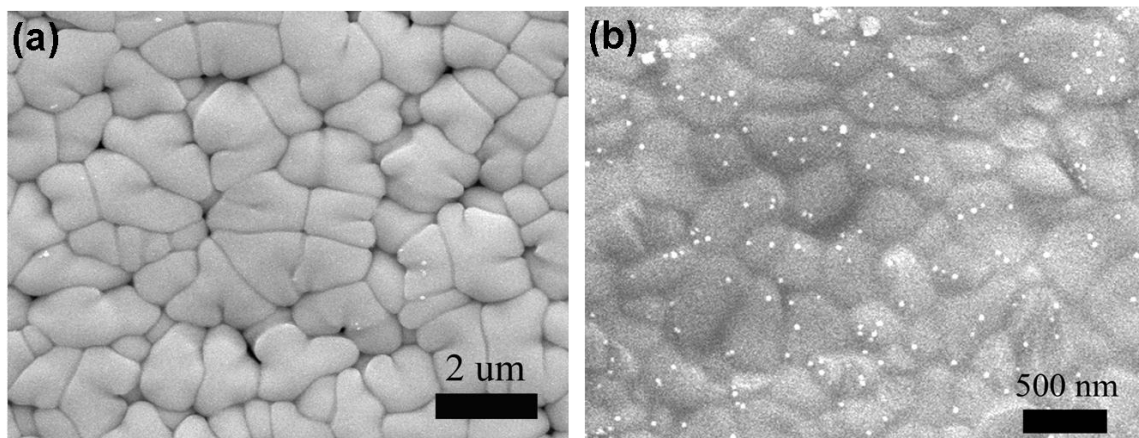

**Fig. S2** SEM images of melt spun ribbon of TAGS-85 material. (a) free surface and (b) contact surface.

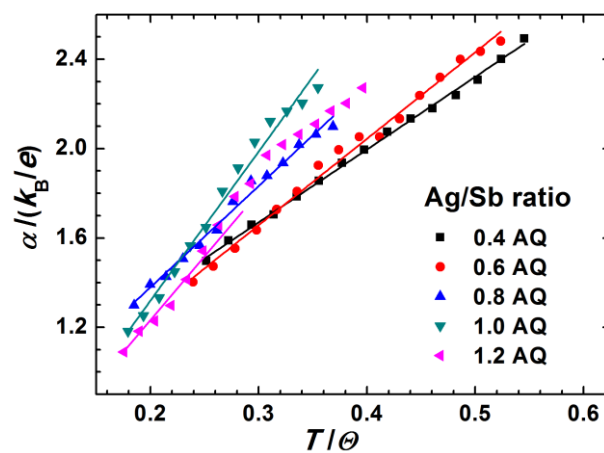

**Fig. S3** Reduced Seebeck coefficient ( $\frac{\alpha}{k_B/e}$ ) versus reduced temperature ( $\frac{T}{\Theta}$ ) for slowly cooled TAGS-85 samples
